# Supplementary material for: Retracted articles in scientific literature: A bibliometric analysis from 2003 to 2022 using the Web of Science
Source: PubMed Central journal article supplement — Heliyon. 2024 Sep 26;10(20):e38620. doi: 10.1016/j.heliyon.2024.e38620 (PMC11619962; doi:10.1016/j.heliyon.2024.e38620), 2024-09-26
Supplement: mmc1.pdf [file mmc1.pdf]

## Supplemental Information

**Table S1.** Reasons for retraction from the Retraction Watch Database recoded into 12 categories.

| Reasons for Retraction                    | Count (%)          |
|-------------------------------------------|--------------------|
| <b>1. Data and Results Issues</b>         | <b>6160 (28.8)</b> |
| 1. Unreliable Results                     | 1234 (5.8)         |
| 2. Concerns/Issues About Data             | 1132 (5.3)         |
| 3. Error in Data                          | 633 (3.0)          |
| 4. Original Data not Provided             | 481 (2.2)          |
| 5. Unreliable Data                        | 431 (2.0)          |
| 6. Error in Results and/or Conclusions    | 376 (1.8)          |
| 7. Error in Analyses                      | 333 (1.6)          |
| 8. Error in Methods                       | 322 (1.5)          |
| 9. Results Not Reproducible               | 308 (1.4)          |
| 10. Concerns/Issues About Results         | 267 (1.2)          |
| 11. Error in Text                         | 74 (0.3)           |
| 12. Error in Materials (General)          | 54 (0.3)           |
| 13. Error in Cell Lines/Tissues           | 37 (0.2)           |
| 14. Contamination of Cell Lines/Tissues   | 34 (0.2)           |
| 15. Contamination of Materials (General)  | 18 (0.1)           |
| 16. Contamination of Reagents             | 2 (0.1)            |
| 17. Manipulation of Results               | 17 (0.1)           |
| 18. Unreliable Image                      | 98 (0.5)           |
| 19. Error in Image                        | 309 (1.4)          |
| <b>2. Authorship and Ethical Concerns</b> | <b>1918 (9.0)</b>  |
| 1. Concerns/Issues About Authorship       | 292 (1.4)          |
| 2. Misconduct by Author                   | 504 (2.4)          |
| 3. Ethical Violations by Author           | 194 (0.9)          |
| 4. False/Forged Authorship                | 253 (1.2)          |
| 5. Conflict of Interest                   | 50 (0.2)           |

|                                                  |                    |
|--------------------------------------------------|--------------------|
| 6. Lack of Approval from Author                  | 123 (0.6)          |
| 7. Lack of Approval from Company/Institution     | 64 (0.3)           |
| 8. Lack of Approval from Third Party             | 62 (0.3)           |
| 9. Informed/Patient Consent - None/Withdrawn     | 39 (0.2)           |
| 10. Author Unresponsive                          | 312 (1.5)          |
| 11. False Affiliation                            | 25 (0.1)           |
| <b>3. Plagiarism and Duplication</b>             |                    |
| 1. Duplication of Image                          | 1465 (6.8)         |
| 2. Duplication of Article                        | 671 (3.1)          |
| 3. Duplication of Data                           | 270 (1.3)          |
| 4. Duplication of Text                           | 178 (0.8)          |
| 5. Plagiarism of Article                         | 425 (2.0)          |
| 6. Euphemisms for Plagiarism                     | 351 (1.6)          |
| 7. Plagiarism of Text                            | 303 (1.4)          |
| 8. Plagiarism of Image                           | 131 (0.6)          |
| 9. Plagiarism of Data                            | 107 (0.5)          |
| 10. Euphemisms for Duplication                   | 184 (0.9)          |
| <b>4. Image Manipulation and Fabrication</b>     | <b>4085 (19.1)</b> |
| 1. Manipulation of Images                        | 444 (2.1)          |
| 2. Concerns/Issues About Image                   | 439 (2.0)          |
| 3. Falsification/Fabrication of Image            | 209 (1.0)          |
| <b>5. Investigations and Findings</b>            | <b>3588 (16.8)</b> |
| 1. Investigation by Journal/Publisher            | 1273 (5.9)         |
| 2. Investigation by Company/Institution          | 948 (4.4)          |
| 3. Investigation by Third Party                  | 813 (3.8)          |
| 4. Misconduct - Official Investigation/Finding   | 465 (2.2)          |
| 5. Investigation by Office of Research Integrity | 89 (0.4)           |
| <b>6. Peer Review and Editorial Issues</b>       | <b>985 (4.6)</b>   |
| 1. Fake Peer Review                              | 740 (3.5)          |
| 2. Rogue Editor                                  | 232 (1.1)          |
| 3. Concerns/Issues with Peer Review              | 6 (<0.1)           |
| 4. Taken via Peer Review                         | 7 (<0.1)           |
| <b>7. Misconduct and Fraud</b>                   | <b>1288 (6.0)</b>  |

|                                                    |                  |
|----------------------------------------------------|------------------|
| 1. Paper Mill                                      | 650 (3.0)        |
| 2. Falsification/Fabrication of Data               | 558 (2.6)        |
| 3. Falsification/Fabrication of Results            | 37 (0.2)         |
| 4. Misconduct by Third Party                       | 11 (0.1)         |
| 5. Misconduct by Company/Institution               | 2 (0.1)          |
| 6. Euphemisms for Misconduct                       | 10 (<0.1)        |
| 7. Randomly Generated Content                      | 1 (<0.1)         |
| 8. Ethical Violations by Third Party               | 19 (0.1)         |
| <b>8. Procedural and Legal Issues</b>              | <b>70 (0.3)</b>  |
| 1. Legal Reasons/Legal Threats                     | 20 (0.1)         |
| 2. Criminal Proceedings                            | 29 (0.1)         |
| 3. Civil Proceedings                               | 7 (<0.1)         |
| 4. Nonpayment of Fees/Refusal to Pay               | 4 (<0.1)         |
| 5. Publishing Ban                                  | 10 (<0.1)        |
| <b>9. Withdrawal and Retraction Notices</b>        | <b>763 (3.6)</b> |
| 1. Withdrawal                                      | 85 (0.4)         |
| 2. Retract and Replace                             | 74 (0.3)         |
| 3. Temporary Removal                               | 2 (<0.1)         |
| 4. Date of Retraction/Other Unknown                | 226 (1.1)        |
| 5. Notice - Limited or No Information              | 153 (0.7)        |
| 6. Notice - Lack of                                | 12 (0.1)         |
| 7. Notice - Unable to Access via current resources | 12 (0.1)         |
| 8. Upgrade/Update of Prior Notice                  | 269 (1.3)        |
| 9. Updated to Retraction                           | 4 (<0.1)         |
| 10. Notice - No/Limited Information                | 2 (<0.1)         |
| <b>10. Complaints and Objections</b>               | <b>418 (2.0)</b> |
| 1. Objections by Third Party                       | 232 (1.1)        |
| 2. Objections by Author(s)                         | 131 (0.6)        |
| 3. Objections by Company/Institution               | 10 (<0.1)        |
| 4. Complaints about Author                         | 39 (0.2)         |
| 5. Complaints about Third Party                    | 4 (<0.1)         |
| 6. Complaints about Company/Institution            | 2 (<0.1)         |
| <b>11. Institutional and Policy Issues</b>         | <b>643 (3.0)</b> |

|                                                             |                  |
|-------------------------------------------------------------|------------------|
| 1. Breach of Policy by Author                               | 131 (0.6)        |
| 2. Lack of IRB/IACUC Approval                               | 136 (0.6)        |
| 3. Concerns/Issues about Third Party Involvement            | 84 (0.4)         |
| 4. Concerns/Issues about Referencing/Attributions           | 257 (1.2)        |
| 5. Concerns/Issues about Human Subject Welfare              | 1 (<0.1)         |
| 6. Cites Retracted Work                                     | 34 (0.2)         |
| <b>12. Miscellaneous</b>                                    | <b>412 (1.9)</b> |
| 1. Copyright Claims                                         | 101 (0.5)        |
| 2. Error by Journal/Publisher                               | 48 (0.2)         |
| 3. Error by Third Party                                     | 6 (<0.1)         |
| 4. Duplicate Publication through Error by Journal/Publisher | 49 (0.2)         |
| 5. Bias Issues or Lack of Balance                           | 12 (0.1)         |
| 6. Doing the Right Thing                                    | 41 (0.2)         |
| 7. Salami Slicing                                           | 9 (<0.1)         |
| 8. Miscommunication by Author                               | 32 (0.1)         |
| 9. Miscommunication by Journal/Publisher                    | 6 (<0.1)         |
| 10. Miscommunication by Company/Institution                 | 3 (<0.1)         |
| 11. Miscommunication by Third Party                         | 4 (<0.1)         |
| 12. Retract and Replace                                     | 74 (0.3)         |
| 13. Taken from Dissertation/Thesis                          | 24 (0.1)         |
| 14. Not Presented at Conference                             | 1 (<0.1)         |
| 15. Withdrawn to Publish in Different Journal               | 2 (<0.1)         |
| 16. Sabotage of Materials (Miscellaneous)                   | 0 (0)            |
| 17. Sabotage of Methods (Miscellaneous)                     | 0 (0)            |

---
